# Supplementary material for: Construction of a fractional condensation device and its application in the analysis of volatile compounds from tobacco
Source: Royal Society of Chemistry journal article supplement (doi:10.1039/c4ay02280g), 2014-11-21
Supplement: c4ay02280g1.xlsx [file c4ay02280g1.xlsx]

## Sheet: Sheet1
		Table 4
	Compound	RT	Total Areaa (Ab*s)	Match quality	RQ
		minute			(µg/ 50 g)
1	Acetic acid	3.737	1348547716	91	399.1
2	Propanoic acid, 2-methyl-, methyl ester	3.829	4250561869	91	2438.13
3	2,5-dimethyl-Furan	4.003	3231191330	83	1606.56
4	Pyridine	4.685	961983513	80	206.15
5	dihydro-2-methyl-3(2H)-Furanone	5.773	806001547	90	304.85
6	Furfural	6.556	8672157633	95	3469.17
7	2-Furanmethanol	7.34	211029286	94	64.08
8	2-Cyclopentene-1,4-dione	7.94	1673382073	91	588.74
9	Cyclohexanone	8.206	95381010	94	32.92
10	2-methyl-2-Cyclopenten-1-one	8.501	375032141	94	133.93
11	1-(2-furanyl)-Ethanone	8.665	1208452552	91	435.41
12	2-Cyclohexen-1-one	9.347	75046715	90	22.21
13	5-methyl-2-Furancarboxaldehyde	10.493	4012619899	91	1417.99
14	Phenol	11.117	311247244	95	92.11
15	2-Furanmethanol, acetate	11.48	216228381	88	75.1
16	1-methyl-4-(1-methylethyl)-Benzene	12.559	985471185	92	367.63
17	Limonene	12.704	7103004519	94	3015.16
18	2,3-dimethyl-2-Cyclopenten-1-one	12.994	78272050	90	23.16
19	Benzene acetaldehyde	13.318	458453263	92	164.37
20	2-methyl-Phenol	13.715	83455802	97	24.7
21	4-methyl-Phenol	14.532	92135014	96	27.27
22	2-methoxy-Phenol	14.813	273671899	95	80.99
23	Benzoic acid, methyl ester	15.132	92197047	93	32.21
24	3-ethyl-2-hydroxy-2-Cyclopenten-1-one	15.886	35593547	96	10.53
25	solanone	24.45	24424963	82	9.58
26	Megastigmatrienone3	31.141	20847333	96	6.17
27	Megastigmatrienone2	32.084	3102642	94	0.92
28	Megastigmatrienone1	32.471	11620067	98	3.44
29	NEOPHYTADIENE	38.285	27392344	96	9.79
30	Hexadecanoic acid, methyl ester	40.563	2837326	96	0.84
