# Supplementary material for: Construction of a fractional condensation device and its application in the analysis of volatile compounds from tobacco
Source: Royal Society of Chemistry journal article supplement (doi:10.1039/c4ay02280g), 2014-11-21
Supplement: c4ay02280g2.xlsx [file c4ay02280g2.xlsx]

## Sheet: Sheet1
	Cold source transfer time (min) Mode 1												Table 2					Table 3
Thermo detector(ºC)	0	20	40	60	80	100	120	140	160	180								Capture tube	Number of components			Average	RSD	STDVE
test1	28	6	-12	-29	-40	-50	-58	-67	-71	-73									Ⅰ	Ⅱ	Ⅲ
test2	28	11	-7	-23	-34	-44	-54	-63	-68	-68		capture tube	carrier gas flow rate (mL/min) n=3					No.1	88	88	89	88	0.0065608	0.57735
test3	29	18	3	-11	-21	-31	-43	-53	-58	-61			300	500	700			No.2	76	77	80	78	0.026688	2.08167
test4	28	20	7	-4	-13	-25	-38	-47	-52	-55		No.1	94	88	84			No.3	66	65	68	66	0.0231443	1.52753
test5	29	10	3	-3	-8	-13	-21	-26	-30	-28		No.5	39	46	45			No.4	37	38	42	39	0.0678398	2.64575
test6	30	20	12	5	2	-3	-11	-18	-22	-21		No.10	36	68	69			No.5	49	46	45	47	0.0442908	2.08167
test7	29	20	13	7	4	-2	-9	-16	-20	-20		No.15	7	19	22			No.6	54	50	53	52	0.040032	2.08167
test8	29	19	14	8	5	0	-7	-14	-18	-18		No.19	2	1	1			No.7	45	44	41	43	0.0484108	2.08167
												Total	178	222	221			No.8	47	44	43	45	0.0462592	2.08167
																		No.9	32	35	30	32	0.0786441	2.51661
	Cold source transfer time (min) Mode 2																	No.10	66	68	64	66	0.030303	2
Thermo detector(ºC)	0	20	40	60	80	100	120	140	160	180								No.11	58	57	53	56	0.0472456	2.64575
test1	27	1	-19	-35	-47	-57	-66	-68	-72	-70								No.12	42	39	40	40	0.0381881	1.52753
test2	28	6	-15	-30	-39	-47	-55	-57	-63	-60								No.13	31	28	30	30	0.0509175	1.52753
test3	28	14	-5	-21	-32	-40	-47	-50	-55	-52								No.14	22	20	19	20	0.0763763	1.52753
test4	28	19	0	-18	-29	-38	-42	-45	-46	-45								No.15	20	19	18	19	0.0526316	1
test5	28	12	-4	-15	-25	-32	-33	-30	-32	-33								No.16	10	9	9	9.3	0.0620807	0.57735
test6	28	17	3	-6	-17	-25	-26	-24	-25	-23								No.17	5	4	4	4.3	0.134268	0.57735
test7	28	19	8	-1	-12	-21	-22	-20	-23	-18								No.18	3	2	2	2.3	0.251022	0.57735
test8	29	21	11	0	-10	-18	-18	-16	-18	-15								No.19	2	1	1	1.3	0.444116	0.57735
